# Supplementary material for: Whole Genome Pathway Analysis Identifies an Association of Cadmium Response Gene Loss with Copy Number Variation in Mutant p53 Bearing Uterine Endometrial Carcinomas
Source: PLoS One. 2016 Jul 8;11(7):e0159114. doi: 10.1371/journal.pone.0159114 (PMC4938382; doi:10.1371/journal.pone.0159114)
Supplement: S1 Table — The table lists the sample identifier, p53 mutation status, as well as the tumor type classification, number of annotated mutations and the other diagnostic criteria for the clinical data used in the study. (XLSX) [file pone.0159114.s002.xlsx]

## Sheet: TableS1
Patient ID	p53 Mutation	Tumor Type	Fraction Genome CNA	# Mutations	Cadmium Call	Age	Stage	Histology
TCGA-A5-A0GJ	H193R	PMCH	0.476	46	CR Loss	44	Stage IA	Endometrioid endometrial adenocarcinoma
TCGA-A5-A0R7	L43*	PMCH	0.353	57	CR Loss	55	Stage IA	Endometrioid endometrial adenocarcinoma
TCGA-AJ-A23M	C277dup	PMCH	0.552	52	CR Loss	61	Stage II	Serous endometrial adenocarcinoma
TCGA-AP-A05H	R248W	PMCH	0.691	57	CR Loss	75	Stage IB	Serous endometrial adenocarcinoma
TCGA-AP-A0L8	R273H	PMCH	0.737	45	CR Loss	70	Stage IIIC2	Serous endometrial adenocarcinoma
TCGA-AP-A0L9	R248W	PMCH	0.524	56	CR Loss	71	Stage IA	Serous endometrial adenocarcinoma
TCGA-AP-A0LI	R273H	PMCH	0.367	69	CR Loss	67	Stage IIIC2	Serous endometrial adenocarcinoma
TCGA-AP-A1DQ	R175H	PMCH	0.501	18	CR Loss	76	Stage IIIC1	Serous endometrial adenocarcinoma
TCGA-AX-A06B	G262V	PMCH	0.511	27	CR Loss	72	Stage IIA	Endometrioid endometrial adenocarcinoma
TCGA-AX-A0IW	C242Afs*5	PMCH	0.654	39	CR Loss	67	Stage IIIA	Serous endometrial adenocarcinoma
TCGA-AX-A2HF	R273C	PMCH	0.916	22	CR Loss	67	Stage IB	Serous endometrial adenocarcinoma
TCGA-B5-A0JN	R249W	PMCH	0.528	118	CR Loss	84	Stage IVB	Serous endometrial adenocarcinoma
TCGA-BG-A0M6	V272M	PMCH	0.655	36	CR Loss	73	Stage IIIC2	Serous endometrial adenocarcinoma
TCGA-BG-A18C	Y220C	PMCH	0.83	48	CR Loss	72	Stage IA	Endometrioid endometrial adenocarcinoma
TCGA-BK-A0CC	Q331*	PMCH	0.561	31	CR Loss	69	Stage IIIC	Serous endometrial adenocarcinoma
TCGA-BS-A0TI	C238Y	PMCH	0.367	59	CR Loss	64	Stage IC	Endometrioid endometrial adenocarcinoma
TCGA-BS-A0U9	N239D	PMCH	0.651	24	CR Loss	59	Stage IIA	Endometrioid endometrial adenocarcinoma
TCGA-BS-A0V8	Y220C	PMCH	0.541	41	CR Loss	68	Stage IIB	Endometrioid endometrial adenocarcinoma
TCGA-D1-A0ZZ	L252del	PMCH	0.504	40	CR Loss	80	Stage IB	Mixed serous and endometrioid
TCGA-D1-A15V	D281Y	PMCH	0.374	19	CR Loss	68	Stage IB	Serous endometrial adenocarcinoma
TCGA-D1-A16I	X332_splice	PMCH	0.381	39	CR Loss	62	Stage IC	Serous endometrial adenocarcinoma
TCGA-D1-A16N	N239S	PMCH	0.51	112	CR Loss	51	Stage IIIA	Endometrioid endometrial adenocarcinoma
TCGA-D1-A16S	G244S	PMCH	0.427	45	CR Loss	70	Stage IIIC	Serous endometrial adenocarcinoma
TCGA-D1-A1NU	R175H	PMCH	0.409	52	CR Loss	74	Stage IA	Serous endometrial adenocarcinoma
TCGA-E6-A1LZ	R249S	PMCH	0.555	153	CR Loss	76	Stage IA	Serous endometrial adenocarcinoma
TCGA-EO-A1Y5	M237K	PMCH	0.406	40	CR Loss	63	Stage IIIC2	Serous endometrial adenocarcinoma
TCGA-EY-A1GS	P278T	PMCH	0.63	138	CR Loss	71	Stage IVB	Serous endometrial adenocarcinoma
TCGA-EY-A212	V173L	PMCH	0.349	29	CR Loss	83	Stage IIIC1	Serous endometrial adenocarcinoma
TCGA-FI-A2D2	D61*	PMCH	0.506	28	CR Loss	66	Stage IB	Mixed serous and endometrioid
TCGA-FI-A2EW	W146*	PMCH	0.555	75	CR Loss	71	Stage IIB	Serous endometrial adenocarcinoma
TCGA-FI-A2EX	R248W	PMCH	0.527	39	CR Loss	58	Stage IIIA	Serous endometrial adenocarcinoma
TCGA-FI-A2F8	S241F	PMCH	0.316	59	CR Loss	64	Stage II	Serous endometrial adenocarcinoma
TCGA-A5-A0R6	R248W	PMCL	0.147	40	CR Loss	64	Stage IIIC1	Endometrioid endometrial adenocarcinoma
TCGA-AP-A052	R273H	PMCL	0.277	38	CR Loss	59	Stage IVB	Endometrioid endometrial adenocarcinoma
TCGA-AP-A053	R248Q	PMCL	0.189	26	CR Loss	90	Stage IA	Endometrioid endometrial adenocarcinoma
TCGA-AP-A05D	R248W	PMCL	0.218	27	CR Loss	67	Stage IIIC2	Endometrioid endometrial adenocarcinoma
TCGA-AP-A05J	R273C	PMCL	0.175	40	CR Loss	66	Stage II	Endometrioid endometrial adenocarcinoma
TCGA-AX-A0IU	P278Lfs*68	PMCL	0.214	50	CR Loss	79	Stage IIIC	Endometrioid endometrial adenocarcinoma
TCGA-AX-A1CP	R273H	PMCL	0.185	23	CR Loss	84	Stage IA	Endometrioid endometrial adenocarcinoma
TCGA-AX-A2H5	G266V	PMCL	0.289	36	CR Loss	67	Stage IIIC	Endometrioid endometrial adenocarcinoma
TCGA-B5-A0K3	H178D	PMCL	0.214	47	CR Loss	62	Stage IA	Endometrioid endometrial adenocarcinoma
TCGA-B5-A11I	R306*	PMCL	0.298	38	CR Loss	65	Stage IVB	Endometrioid endometrial adenocarcinoma
TCGA-B5-A1MU	H193P	PMCL	0.135	29	CR Loss	79	Stage IVB	Mixed serous and endometrioid
TCGA-BG-A0M8	Y220C	PMCL	0.308	72	CR Loss	50	Stage IA	Endometrioid endometrial adenocarcinoma
TCGA-BG-A0YV	R248Q	PMCL	0.243	57	CR Loss	67	Stage IIIA	Endometrioid endometrial adenocarcinoma
TCGA-D1-A169	C141Y	PMCL	0.208	45	CR Loss	63	Stage IV	Endometrioid endometrial adenocarcinoma
TCGA-D1-A16G	R248Q	PMCL	0.101	45	CR Loss	74	Stage IV	Serous endometrial adenocarcinoma
TCGA-D1-A17K	Q167Hfs*3	PMCL	0.263	57	CR Loss	74	Stage IA	Endometrioid endometrial adenocarcinoma
TCGA-D1-A1NX	H179R	PMCL	0.179	29	CR Loss	66	Stage IIIC	Endometrioid endometrial adenocarcinoma
TCGA-DI-A1NN	Q144*	PMCL	0.197	43	CR Loss	63	Stage IIIC	Endometrioid endometrial adenocarcinoma
TCGA-EO-A1Y8	S241C	PMCL	0.3	36	CR Loss	87	Stage IA	Endometrioid endometrial adenocarcinoma
TCGA-AP-A0LF	R273S	PMCH	0.334	166	Normal	82	Stage IVB	Endometrioid endometrial adenocarcinoma
TCGA-BK-A139	R282W	PMCH	0.453	64	Normal	74	Stage IB	Endometrioid endometrial adenocarcinoma
TCGA-A5-A0G5	R248Q	PMCL	0.231	84	Normal	73	Stage IB	Serous endometrial adenocarcinoma
TCGA-A5-A0GW	I232T	PMCL	0.0502	199	Normal	46	Stage IA	Serous endometrial adenocarcinoma
TCGA-AP-A054	R158C	PMCL	0.0545	578	Normal	64	Stage IIIC1	Serous endometrial adenocarcinoma
TCGA-AP-A059	R273C	PMCL	8.276e-05	6245	Normal	69	Stage IA	Serous endometrial adenocarcinoma
TCGA-AP-A05A	Y205C	PMCL	0.183	71	Normal	81	Stage II	Serous endometrial adenocarcinoma
TCGA-AP-A0LH	P151S	PMCL	0.113	24	Normal	60	Stage IA	Serous endometrial adenocarcinoma
TCGA-AX-A060	S240G	PMCL	0.0342	328	Normal	77	Stage IC	Serous endometrial adenocarcinoma
TCGA-AX-A1C8	P128_L130del	PMCL	0.234	54	Normal	77	Stage IIIC	Serous endometrial adenocarcinoma
TCGA-B5-A11E	R342*	PMCL	0.079	5633	Normal	53	Stage IB	Serous endometrial adenocarcinoma
TCGA-B5-A11J	G244S	PMCL	4.16e-05	218	Normal	64	Stage IA	Serous endometrial adenocarcinoma
TCGA-B5-A11N	R209I	PMCL	0.0279	1060	Normal	69	Stage IA	Serous endometrial adenocarcinoma
TCGA-BG-A0M7	C238F	PMCL	5.946e-05	43	Normal	60	Stage IIIC1	Serous endometrial adenocarcinoma
TCGA-BS-A0UF	R213*	PMCL	0.0001096	4757	Normal	65	Stage IB	Serous endometrial adenocarcinoma
TCGA-BS-A0UV	R213*	PMCL	0.125	5220	Normal	55	Stage IIIC	Serous endometrial adenocarcinoma
TCGA-D1-A16Y	S241P	PMCL	2.148e-05	659	Normal	56	Stage IB	Serous endometrial adenocarcinoma
