# Supplementary material for: Whole Genome Pathway Analysis Identifies an Association of Cadmium Response Gene Loss with Copy Number Variation in Mutant p53 Bearing Uterine Endometrial Carcinomas
Source: PLoS One. 2016 Jul 8;11(7):e0159114. doi: 10.1371/journal.pone.0159114 (PMC4938382; doi:10.1371/journal.pone.0159114)
Supplement: S2 Table — The table lists the GO term, with their brief description, followed by the both q and p vales for significance of the observed losses and a listing of the genes included. Note that some genes are listed to impact more than one pathway, and appear more than once in the table. (XLSX) [file pone.0159114.s003.xlsx]

## Sheet: Sheet1
GO term	Description	FDR q-value	P-value	Genes
GO:0002323	natural killer cell activation involved in immune response	3.43e-11	2.49e-15	IFNW1, IFNA5, IFNA6, IFNA7, IFNA8, IFNK, IFNA1, IL12B, IFNA2, IFNA4, IFNA21, IFNA17, IFNA13, IFNA10, IFNA16, IFNA14, IFNE, IFNB1, RAB27A
GO:0007156	homophilic cell adhesion via plasma membrane adhesion molecules	8.36e-11	1.21e-14	PCDHA11, PCDHA10, PCDHA8, PCDHA7, PCDHA6, PCDHA5, PCDHA4, PCDHA3, PCDHA2, PCDHA1, PCDHB16, NPTN, PCDHA9, PCDHB15, PCDHB1, PCDHB11, PCDHB12, PCDHB13, PCDHB14, PCDHB7, PCDHB8, PCDHB9, PCDHB10, PCDHB2, PCDHB3, PCDHB4, PCDHB6, PCDHB5, PCDHA12, PCDHA13, PCDHAC1, PCDHAC2, FAT2
GO:0033141	positive regulation of peptidyl-serine phosphorylation of STAT protein	7.59e-11	1.65e-14	IFNW1, IFNA5, IFNA6, IFNA7, IFNA8, IFNK, IFNA1, IFNA2, IFNA4, IFNA21, IFNA17, IFNA13, IFNA10, IFNA16, IFNA14, IFNE, IFNB1
GO:0033139	regulation of peptidyl-serine phosphorylation of STAT protein	5.69e-11	1.65e-14	IFNW1, IFNA5, IFNA6, IFNA7, IFNA8, IFNK, IFNA1, IFNA2, IFNA4, IFNA21, IFNA17, IFNA13, IFNA10, IFNA16, IFNA14, IFNE, IFNB1
GO:0098742	cell-cell adhesion via plasma-membrane adhesion molecules	1.02e-08	3.71e-12	PCDHA11, PCDHA10, PCDHA8, PCDHA7, PCDHA6, PCDHA5, PCDHA4, PCDHA3, PCDHA2, PCDHA1, PCDHB16, NPTN, PCDHA9, PCDHB15, PCDHB1, PCDHB11, PCDHB12, PCDHB13, PCDHB14, PCDHB7, PCDHB8, PCDHB9, PCDHB10, PCDHB2, PCDHB3, PCDHB4, PCDHB6, PCDHB5, PCDHA12, PCDHA13, PCDHAC1, PCDHAC2, FAT2
GO:0042100	B cell proliferation	3.04e-07	1.32e-10	IFNW1, IFNA5, IFNA6, IFNA7, IFNA8, IFNK, IFNA1, IFNA2, IFNA4, IFNA21, IFNA17, ABL1, MEF2C, IFNA13, IFNA10, GAPT, IFNA16, IFNA14, CD180, IFNE, IFNB1
GO:0007399	nervous system development	7.5e-06	3.82e-09	PCDHA11, PCDHA10, PCDHA8, PCDHA7, PCDHA6, GFRA2, PCDHA5, GFRA3, PCDHA4, PCDHA3, PCDHA2, PCDHA1, CHRNA3, ENC1, KIF2A, NAIP, GPR98, MEF2C, SMN1, APBA1, LPPR1, CSGALNACT1, GPSM1, FKTN, PCDHB15, PCDHB11, PCDHB12, PCDHB2, PCDHB3, PCDHB4, PCDHB6, NINJ1, PCDHAC1, PCDHAC2
GO:0030101	natural killer cell activation	7.93e-06	4.61e-09	IFNW1, HECTD1, IFNA5, IFNA6, IFNA7, IFNA8, IFNK, IFNA1, IL12B, IFNA2, IFNA4, IFNA21, IFNA17, TCF3, IFNA13, IFNA10, IFNA16, IFNA14, TYRO3, IFNE, IFNB1, RAB27A
GO:0014070	response to organic cyclic compound	2.03e-05	1.33e-08	GSN, IL13, ABAT, ABCA2, ABL1, TMEM173, SPARC, P2RX1, KLF9, P2RX5, AQP3, IL4, AQP9, GUCY1A3, GNG2, EGR3, MMP15, BLM, IFNK, CRHBP, DEFB1, ALDH1A2, BMP4, PPARGC1B, C19orf10, ZNF366, AXIN1, CYP11A1, PDCD7, ARSB, PDGFRB, PTCH1, ISL1, DUOX1, PTGDS, PLA2G4F, PTGER2, NTRK3, EGR1, CDO1, MEF2C, CYP1A2, RORA, LCAT, GNAO1, MFGE8, CDKN2B, MBD3, PDE4D, ADRA1B, CHRNB4, GNRH1, CHRNA7, IFNA5, CHRNA2, IFNA6, IFNA7…
GO:0016339	calcium-dependent cell-cell adhesion via plasma membrane cell adhesion molecules	2.13e-05	1.55e-08	PCDHB11, PCDHB16, PCDHB13, PCDHB14, PCDHB9, PCDHB10, PCDHB2, PCDHB3, PCDHB4, PCDHB6, PCDHB5
GO:0002286	T cell activation involved in immune response	5.44e-05	4.35e-08	IFNW1, IL4, RORA, IFNA5, IFNA6, IFNA7, IFNA8, IFNK, IFNA1, IL12B, IFNA2, IFNA4, IFNA21, IFNA17, IFNA13, IFNA10, IFNA16, IFNA14, IFNE, F2RL1, IFNB1, RAB27A
GO:0043330	response to exogenous dsRNA	0.000388	3.38e-07	IFNW1, IFNA5, IFNA6, IFNA7, IFNA8, IFNK, IFNA1, IFNA2, CARD9, IFNA4, IFNA21, IFNA17, TMEM173, IFNA13, IFNA10, IFNA16, IFNA14, IFNE, IFNB1
GO:0043331	response to dsRNA	0.000467	4.41e-07	GRIN2A, IFNW1, IFNA5, IFNA6, IFNA7, IFNA8, IFNK, IFNA1, IFNA2, CARD9, IFNA4, IFNA21, IFNA17, TMEM173, IFNA13, IFNA10, IFNA16, IFNA14, IFNE, IFNB1
GO:0070493	thrombin receptor signaling pathway	0.000804	8.18e-07	IQGAP2, F2R, F2RL1, F2RL2
GO:0002285	lymphocyte activation involved in immune response	0.00179	1.95e-06	IFNA5, IFNA6, IFNA7, IFNA8, IFNA1, IFNA2, IL12B, IFNA4, IFNA21, IFNA17, ABL1, IFNA13, IFNA10, GAPT, IFNA16, IFNA14, CD180, IFNE, IFNB1, IFNW1, IL4, RORA, IFNK, EXOSC3, F2RL1, RAB27A
GO:0042428	serotonin metabolic process	0.00198	2.3e-06	HTR1A, RNF180
GO:0048731	system development	0.00273	3.37e-06	PCDHA11, PCDHA10, PCDHA8, PCDHA7, PCDHA6, GFRA2, PCDHA5, GFRA3, PCDHA4, PCDHA3, HSD17B3, PCDHA2, PCDHA1, CHRNA3, ENC1, KIF2A, NAIP, STRA6, APBA1, LPPR1, ACAN, CSGALNACT1, GPSM1, HAPLN3, PCDHB15, PCDHB11, PCDHB12, PCDHB2, PCDHB3, NME5, PCDHB4, PCDHB6, NINJ1, PCDHAC1, PCDHAC2, HAPLN1, PTCH1, ANP32B, PDGFRB, ARSB, GPR98, MEF2C, SMN1, BARX1, FOXB1, TGFBR1, FKTN, PCSK5, HEXB, SMAD3, VCAN, FBN1, BBS4
GO:1901160	primary amino compound metabolic process	0.00276	3.6e-06	HTR1A, RNF180
GO:0030183	B cell differentiation	0.00317	4.37e-06	ZBTB1, IFNA5, GPR97, IFNA6, IFNA7, IFNA8, IFNA1, IFNA2, IFNA4, PIK3R1, IFNA21, IFNA17, ABL1, IFNA13, IFNA10, IFNA16, IFNA14, IFNE, IFNB1, FNIP1, ONECUT1, IFNW1, IL4, IFNK, TCF3
GO:0071276	cellular response to cadmium ion	0.0031	4.5e-06	MT1X, MT3, CYP11A1, SORD, MT1A, CYP1A2, MT1F, GSN, MT1E, MT1H, MT1G, SPARC
GO:0007155	cell adhesion	0.00392	5.99e-06	PCDHA11, PCDHA10, PCDHA8, PCDHA7, PCDHA6, PCDHA5, PCDHA4, PCDHA3, PCDHA2, PCDHA1, EGFL7, PCDHB16, CTNNA1, PEAK1, APBA1, ACAN, HAPLN3, PCDHA9, BLK, MEGF11, OMD, PCDHB15, PCDHB11, PCDHB12, PCDHB13, PCDHB14, PCDHB7, FUT7, PCDHB8, PCDHB9, PCDHB10, PCDHB2, PCDHB3, ECM2, PCDHB4, F2RL1, PCDHB6, PCDHA12, NINJ1, PCDHA13, GLDN, PCDHAC1, RAB27A, PCDHAC2, CD276, ITGAE, HAPLN1, NEO1, CTNNAL1, ISLR, PSTPIP1, B…
GO:0022610	biological adhesion	0.00477	7.62e-06	PCDHA11, PCDHA10, PCDHA8, PCDHA7, PCDHA6, PCDHA5, PCDHA4, PCDHA3, PCDHA2, PCDHA1, EGFL7, PCDHB16, CTNNA1, PEAK1, APBA1, ACAN, HAPLN3, PCDHA9, BLK, MEGF11, OMD, PCDHB15, PCDHB11, PCDHB12, PCDHB13, PCDHB14, PCDHB7, FUT7, PCDHB8, PCDHB9, PCDHB10, PCDHB2, PCDHB3, ECM2, PCDHB4, F2RL1, PCDHB6, NINJ1, PCDHA12, PCDHA13, GLDN, PCDHAC1, RAB27A, PCDHAC2, CD276, ITGAE, HAPLN1, NEO1, CTNNAL1, ISLR, PSTPIP1, B…
GO:0018894	dibenzo-p-dioxin metabolic process	0.005	8.35e-06	CYP11A1, CYP1A1, CYP1A2
GO:0098609	cell-cell adhesion	0.0053	9.24e-06	PCDHA11, PCDHA10, PCDHA8, PCDHA7, PCDHA6, PCDHA5, PCDHA4, PCDHA3, PCDHA2, PCDHA1, B2M, PCDHB16, DLL4, GPR98, CTNNA1, NPTN, PCDHA9, BLK, MEGF11, PCDHB15, PCDHB11, PCDHB1, PCDHB12, NEDD4, PCDHB13, THBS4, PCDHB14, PCDHB7, FUT7, PCDHB8, PCDHB9, PCDHB10, PCDHB2, PCDHB3, SMAD3, PCDHB4, F2RL1, PCDHB6, PCDHA12, PCDHB5, PCDHA13, GLDN, RAB27A, PCDHAC1, PCDHAC2, CD276, FAT2
GO:0042430	indole-containing compound metabolic process	0.0093	1.69e-05	HTR1A, RNF180
GO:1901698	response to nitrogen compound	0.0106	2e-05	TSC1, GSN, IL13, RAB8B, ABAT, GCNT1, NAIP, ABL1, TMEM173, SPARC, P2RX1, P2RX5, AQP9, GUCY1B3, GNG2, EGR3, BLK, BLM, IFNK, CRHBP, MYO5A, BMP4, PPARGC1B, CYP11A1, GLRB, DUOX1, GLRA1, NTRK2, EGR1, CDO1, SLC38A9, MEF2C, CPEB1, NSMF, FER, GNG7, ADCY9, DBH, GNAO1, TRAF2, PDE4D, FBN1, ADRA1B, ERBB2IP, CHRNB4, GNG10, GNRH1, CHRNA7, PRKACG, CHRNA2, IFNA5, IFNA6, IFNA7, ADRB2, IFNA8, IFNA1, IFNA2, IFNA4, I…
GO:0030098	lymphocyte differentiation	0.0106	2.09e-05	HECTD1, ZBTB1, IFNA5, GPR97, IFNA6, IFNA7, IFNA8, IFNA1, IL12B, IFNA2, B2M, PIK3R1, IFNA4, EGR1, IFNA21, IFNA17, DLL4, ABL1, IFNA13, NFATC3, IFNA10, IFNA16, IFNA14, ITK, TYRO3, IFNE, IFNB1, FNIP1, APC, ONECUT1, IFNW1, IL4, RORA, BLK, IFNK, TCF3, IRF1, FUT7, ANXA1
GO:0033477	S-methylmethionine metabolic process	0.0113	2.3e-05	BHMT2, BHMT
GO:0033528	S-methylmethionine cycle	0.0109	2.3e-05	BHMT2, BHMT
GO:0006959	humoral immune response	0.0109	2.37e-05	IFNA5, PAX5, IFNA6, IFNA7, IFNA8, IFNA1, IFNA2, B2M, IFNA4, RNASE3, IFNA21, IFNA17, MEF2C, IFNA13, IFNA10, IFNA16, IFNA14, IFNE, CLU, IFNB1, NOTCH1, ANG, IFNW1, C1QBP, FCN2, FCN1, IFNK, DEFA5, DEFA6, DEFB1, DEFA4, C8G
GO:0007416	synapse assembly	0.0109	2.45e-05	PCDHB11, PCDHB16, PCDHB13, PCDHB14, PCDHB9, PCDHB10, PCDHB2, PCDHB3, PCDHB4, PCDHB6, PCDHB5
GO:0030207	chondroitin sulfate catabolic process	0.013	3.02e-05	HEXB, CSPG4, VCAN, ARSB
GO:0015936	coenzyme A metabolic process	0.0145	3.47e-05	HMGCR, MCCC2, PPCDC
GO:0042113	B cell activation	0.0152	3.76e-05	IFNA5, ZBTB1, IFNA6, GPR97, IFNA7, IFNA8, IFNA1, IFNA2, IFNA4, PIK3R1, IFNA21, IFNA17, ABL1, MEF2C, IFNA13, IFNA10, GAPT, IFNA16, IFNA14, CD180, IFNE, IFNB1, FNIP1, IFNW1, ONECUT1, IL4, IFNK, TCF3, EXOSC3, CHRFAM7A
GO:0002366	leukocyte activation involved in immune response	0.0156	3.96e-05	SYK, IFNA5, IFNA6, IFNA7, IFNA8, IFNA1, IL12B, IFNA2, IFNA4, IFNA21, IFNA17, ABL1, IFNA13, IFNA10, GAPT, IFNA16, CD180, IFNA14, IFNE, IFNB1, IFNW1, IL4, RORA, IFNK, RASGRP1, NR4A3, EXOSC3, F2RL1, RAB27A
GO:0002263	cell activation involved in immune response	0.0211	5.52e-05	SYK, IFNA5, IFNA6, IFNA7, IFNA8, IFNA1, IL12B, IFNA2, IFNA4, IFNA21, IFNA17, ABL1, IFNA13, IFNA10, GAPT, IFNA16, CD180, IFNA14, IFNE, IFNB1, IFNW1, IL4, RORA, IFNK, RASGRP1, NR4A3, EXOSC3, F2RL1, RAB27A
GO:0010817	regulation of hormone levels	0.0251	6.74e-05	STRA6, FOXD1, CRHBP, CYP11A1, CARTPT, GCNT4, CYP1A1, PCSK1
GO:0007610	behavior	0.0287	7.93e-05	HMGCR, HEXB, MEF2C, CARTPT, GCNT4, HTR1A, RNF180
GO:0033138	positive regulation of peptidyl-serine phosphorylation	0.0368	0.000104	TEK, IFNW1, AXIN1, IFNA5, IFNA6, IFNA7, IFNA8, IFNK, IFNA1, NTRK3, IFNA2, NTRK2, IFNA4, IFNA21, IFNA17, FNIP2, IFNA13, IFNA10, IFNA16, IFNA14, IFNE, IFNB1, FNIP1, TXN
GO:0010041	response to iron(III) ion	0.0431	0.000125	CCNB1, CYP1A1
GO:0000281	mitotic cytokinesis	0.0449	0.000134	SNX33, KIF23, RASA1, BBS4, NUSAP1, APC, KIF20A, SNX18, USP8
GO:0046686	response to cadmium ion	0.044	0.000134	MT1X, MT3, CYP11A1, MT1A, GSN, MT1F, MT1E, MT1H, MT1G, B2M, SORD, SPARC, ALAD, CYP1A2
GO:0006579	amino-acid betaine catabolic process	0.0442	0.000138	DMGDH, BHMT
GO:0043436	oxoacid metabolic process	0.0452	0.000144	CYP11A1, DMGDH, ARSB, BHMT, ACOT12, PPCDC, CKMT2, STRA6, HEXB, BHMT2, DHFR, CSPG4, CYP1A1, CYP1A2, MCCC2, ETFA
